# Supplementary material
Source: PubMed Central journal article supplement (PMC7786239)
Supplement: NIHMS1659171-supplement-1.pdf [file NIHMS1659171-supplement-1.pdf]

453 **Supplementary materials**

454

455 **Fig S1. Functional activation of ROI in sensorimotor areas of unaffected hemisphere.**

456 **Fig. S2. Effect sizes of functional correlations.**

457 **Fig. S3. Distribution of the adjusted  $P$  values for the whole-brain functional connectivity analysis**  
458 **comparison to phantom sensation during task.**

459 **Fig. S4. Correlations for ROI-to-ROI connectivity.**

460 **Fig. S5. Correlations for network-to-network connectivity.**

461 **Fig. S6. Residual limb muscle activation during task.**

462 **Fig. S7. ROI segmentation.**

463 **Fig. S8. Quality control histograms of motion correction parameter values across all participants.**

464 **Fig. S9. Quality assurance plot of denoising.**

465 **Table S1. Subject demographics**

466 **Table S2. Individual subject data for functional activation and neuromuscular characteristics**

467

# **“Agonist-antagonist myoneural interface amputation preserves proprioceptive sensorimotor neurophysiology in lower limbs”**

## **Supplemental Materials**

Shriya S. Srinivasan<sup>1,2,3</sup>, Greta Tuckute<sup>2</sup>, Jasmine Zou<sup>2</sup>, Samantha Gutierrez-Arango<sup>2,3</sup>, Hyungeun Song<sup>1,2,3</sup>, Robert L. Barry<sup>1,3,4</sup> & Hugh Herr<sup>2</sup>

<sup>1</sup> Harvard-MIT Program in Health Sciences and Technology, Massachusetts Institute of Technology, Cambridge, Massachusetts, USA

<sup>2</sup> MIT Center for Extreme Bionics, Massachusetts Institute of Technology, Cambridge, Massachusetts, USA

<sup>3</sup> Athinoula A. Martinos Center for Biomedical Imaging, Department of Radiology, Massachusetts General Hospital, Charlestown, Massachusetts, USA

<sup>4</sup> Department of Radiology, Harvard Medical School, Boston, Massachusetts, USA

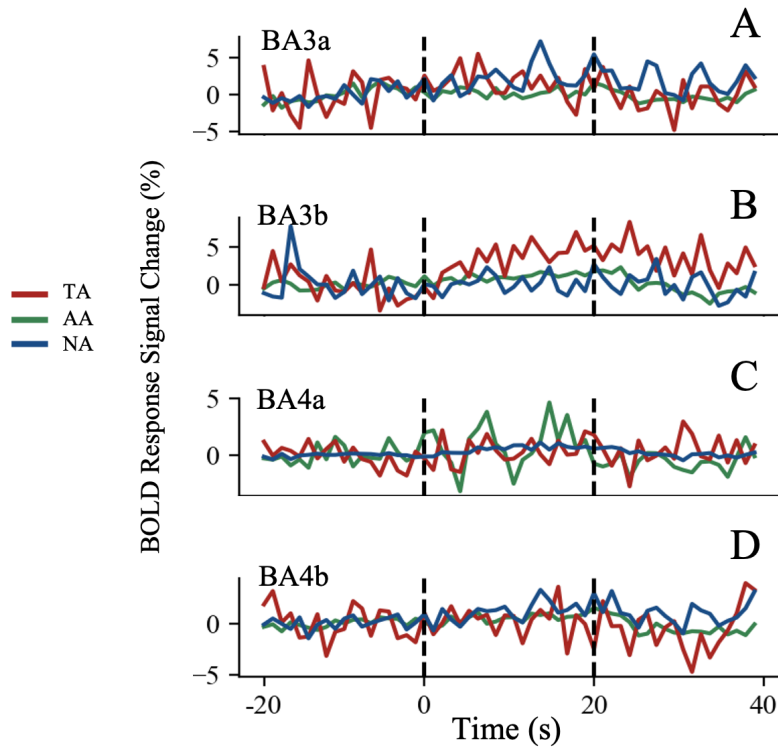

**Fig S1. Functional Activation of ROI in sensorimotor areas of unaffected hemisphere.** Mean percent change in the signal arising from the A) BA3a, B) BA3b, C) BA4a, D) BA4b areas of the hemisphere ipsilateral to the affected limb for each group (TA: maroon, AA: green, NA: blue). No significant difference was found between groups ( $p > 0.05$ , Kruskal Wallis).

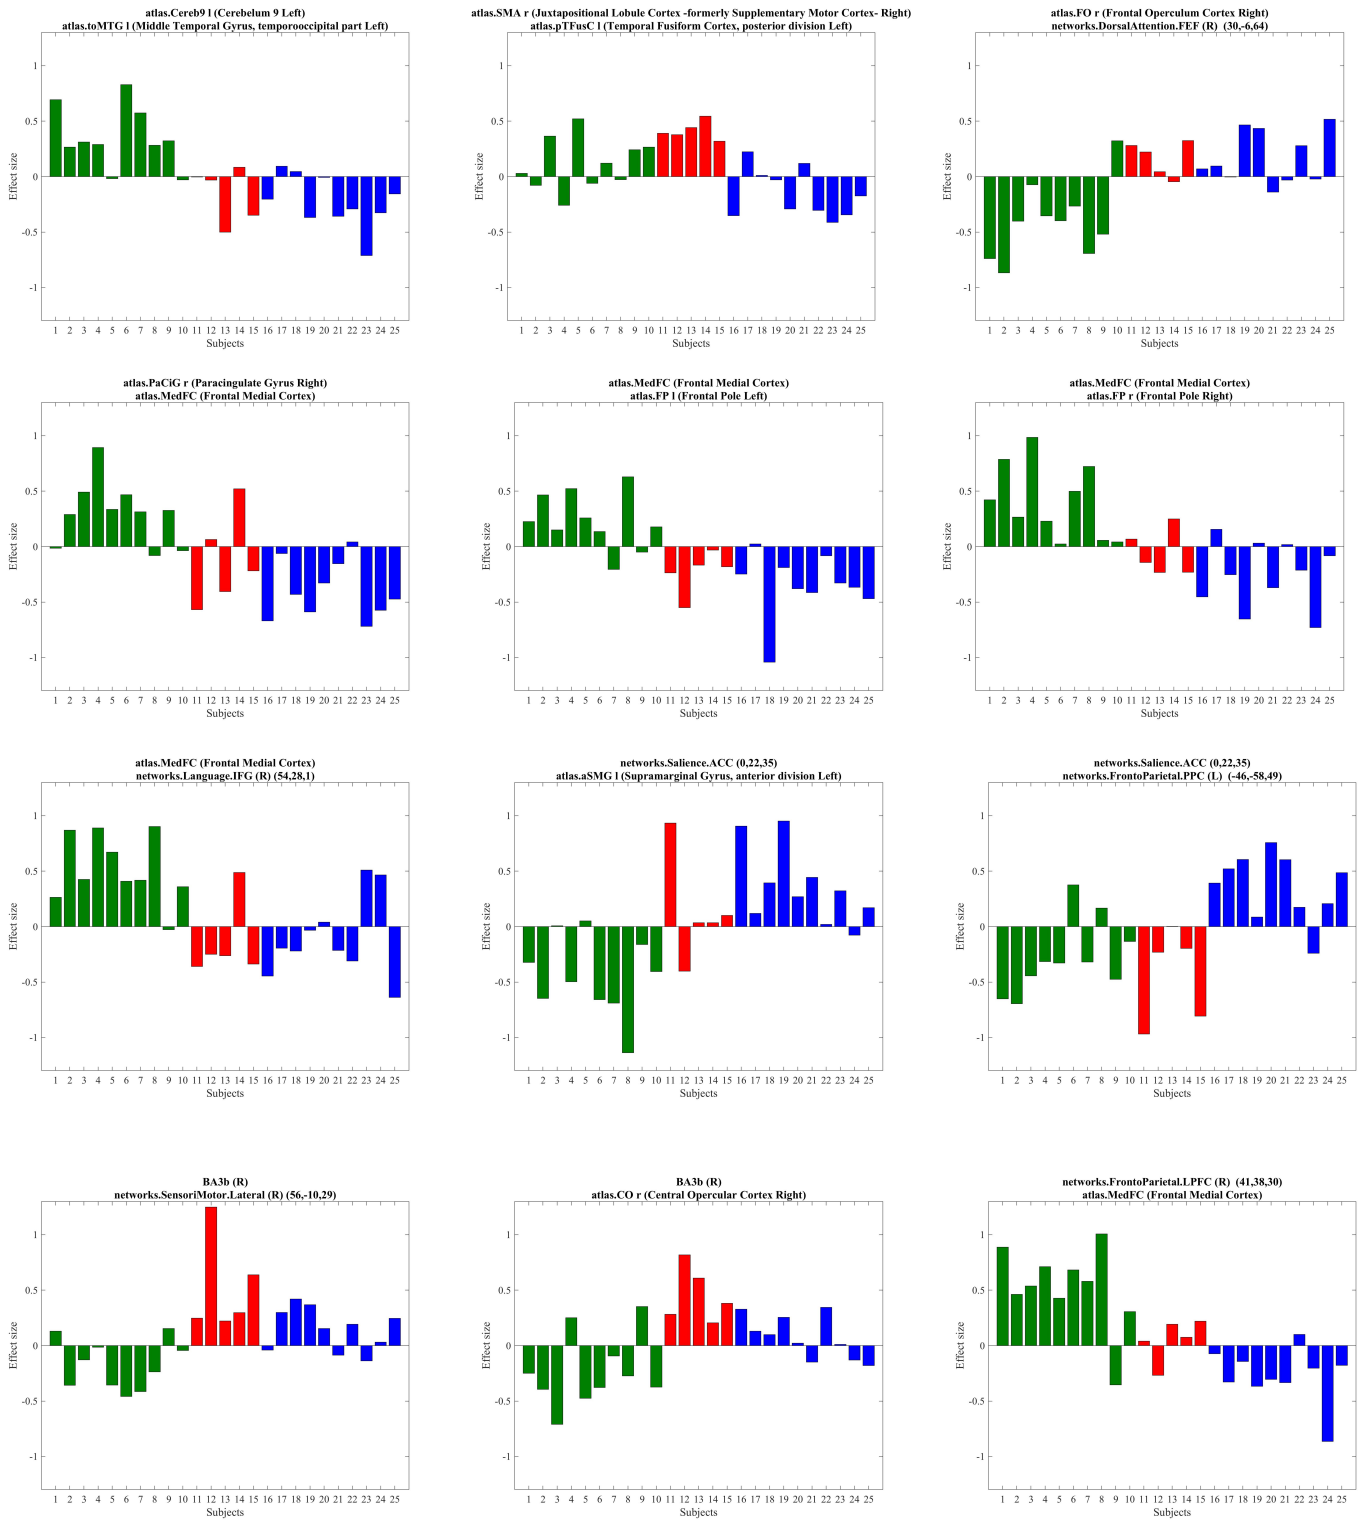

**Fig. S2. Effect sizes of functional correlations.** The effect size is plotted among the three groups as determined by a second-level random-effect GLM analysis at a significance threshold of a cluster corrected  $p^{\text{FDR}} < 0.05$ ,  $n = 25$ . The condition was activation between 75% ankle movement and rest. AA: green, TA: orange, NA: blue.

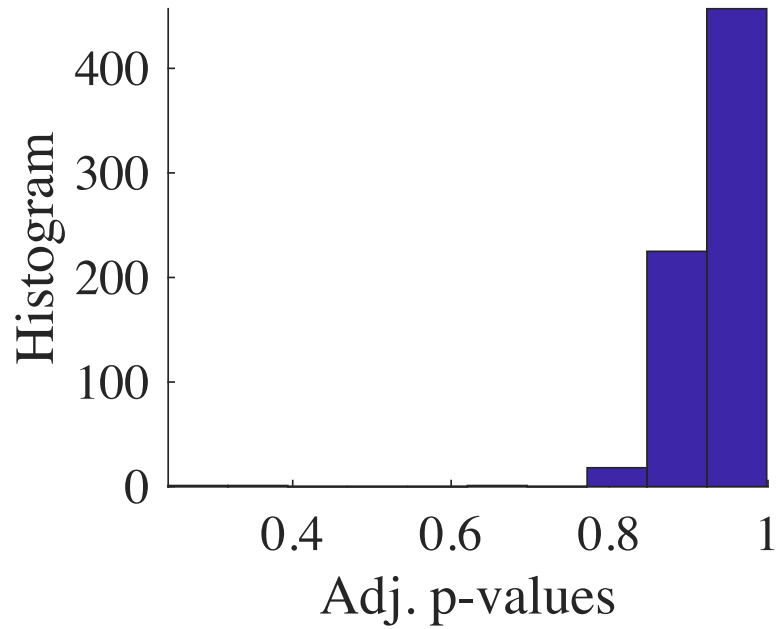

**Fig. S3. Distribution of the adjusted p values for the whole-brain functional connectivity analysis comparison to phantom sensation during task.** Multiple comparison correction was performed using the Benjamin-Hochberg method. The new alpha of 0.35 was determined at the fifth percentile, below which only two p values were present.

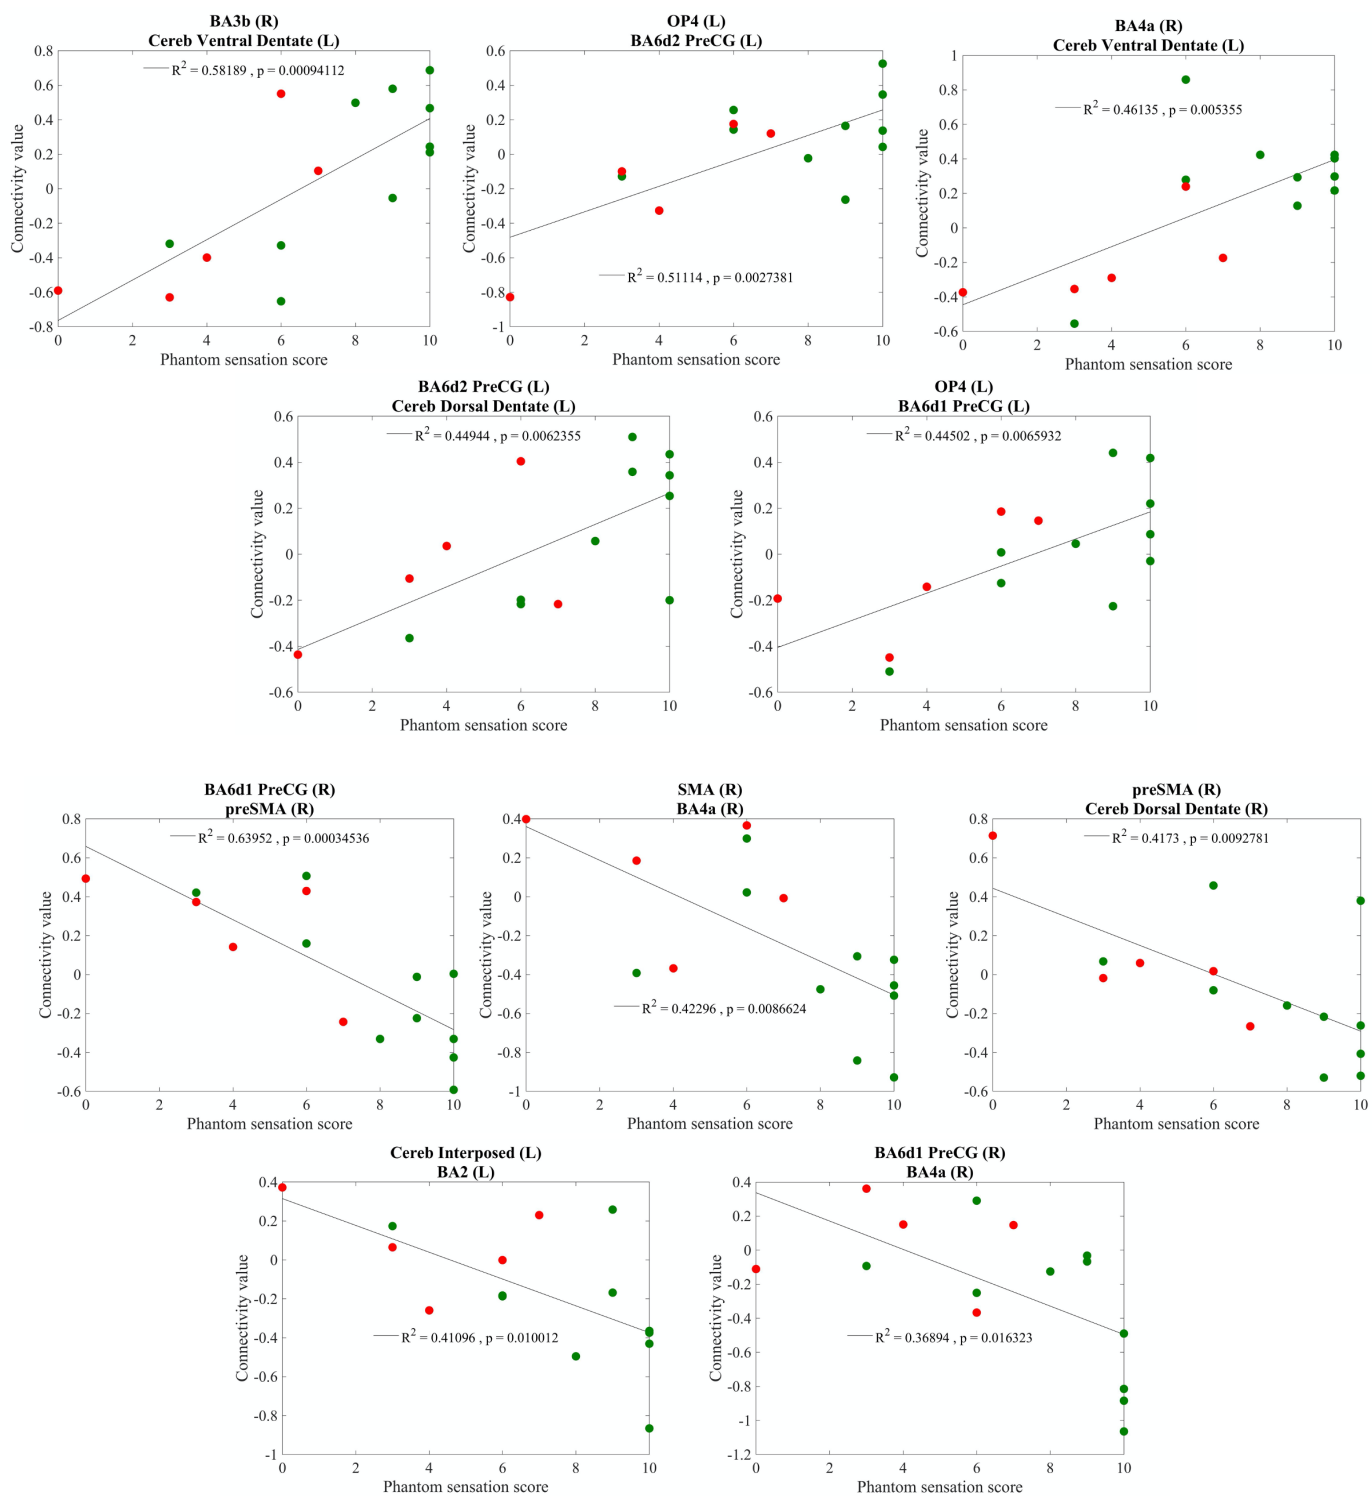

**Fig. S4. Correlations for ROI-to-ROI connectivity.** Individual data from the greatest positive and negative correlations are presented for ROI-to-ROI connectivity analyses correlated with phantom sensation (TA: n = 5, orange, AA: n=10, green).

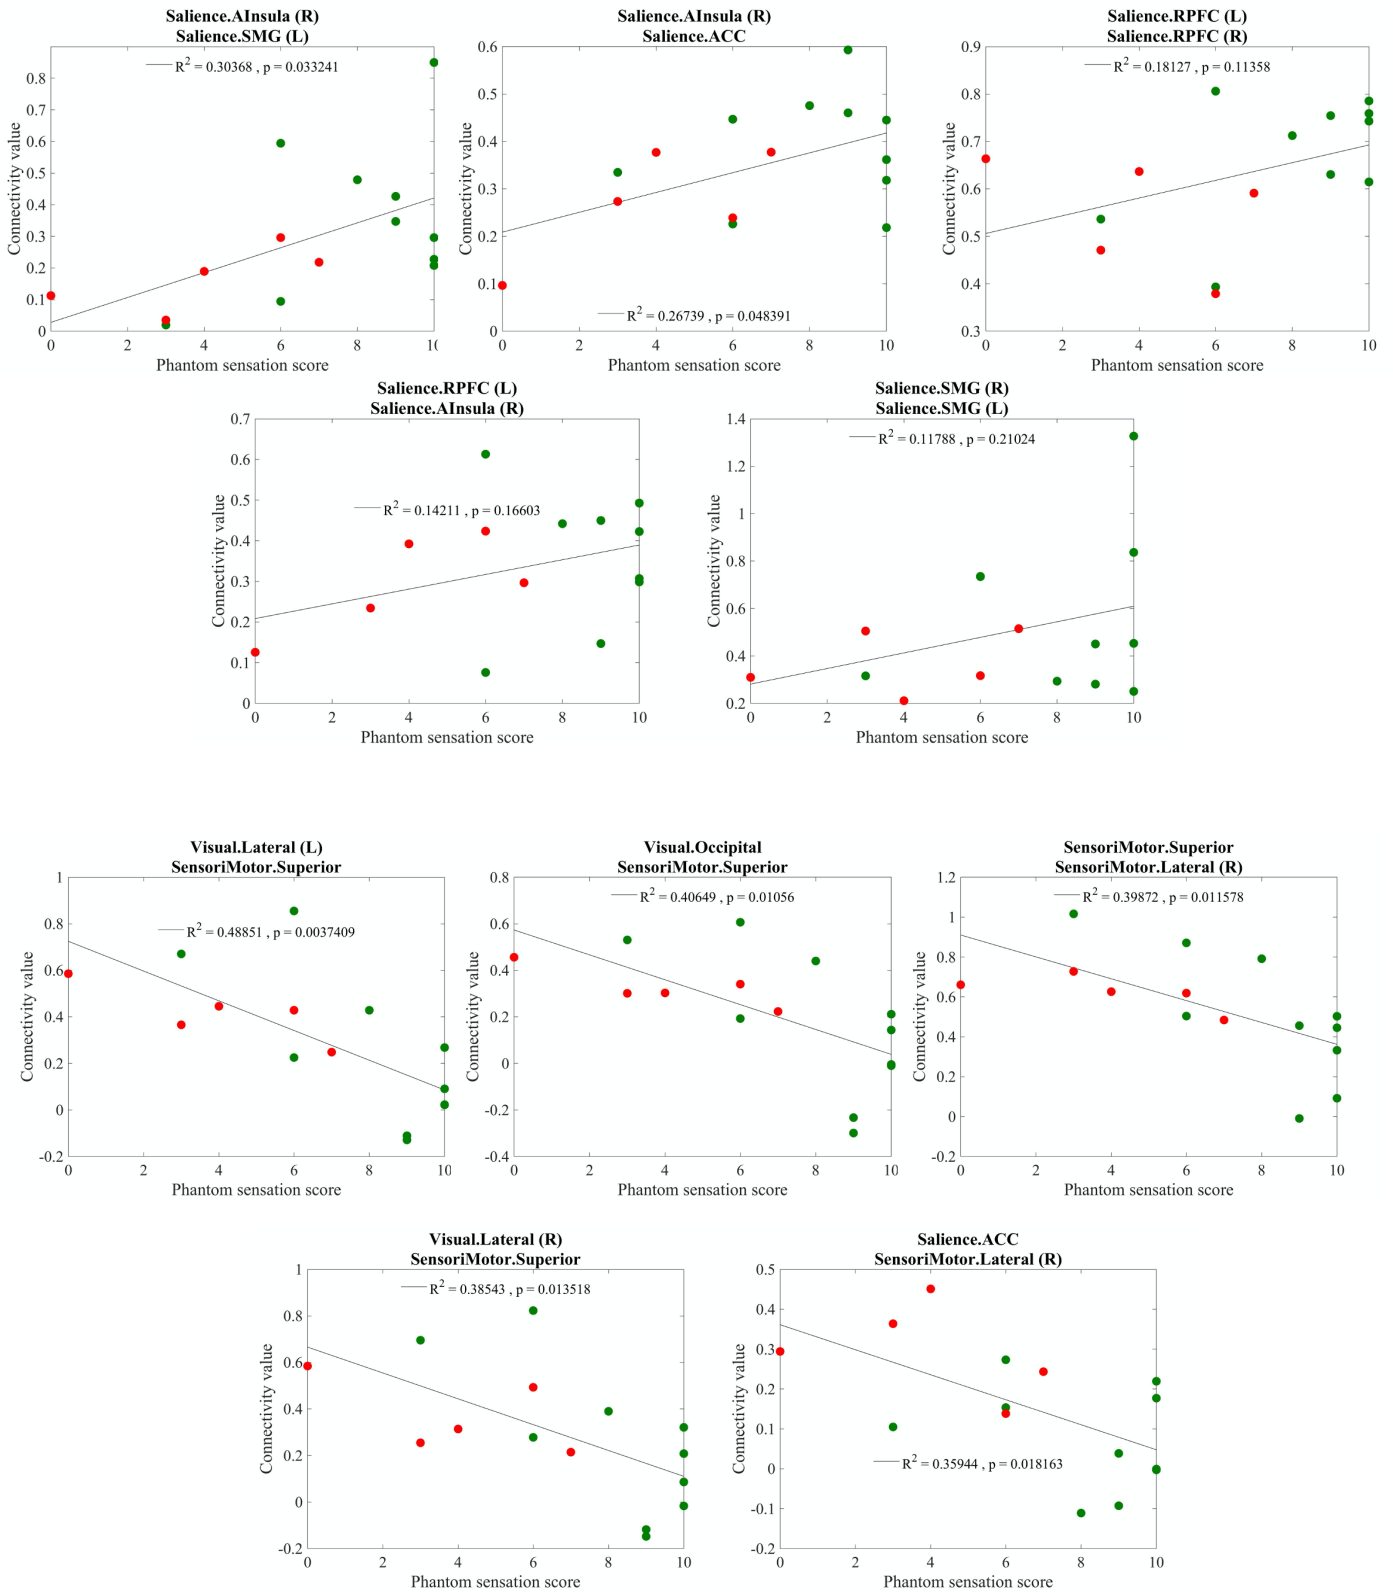

**Fig. S5. Correlations for network-to-network connectivity.** Individual data from the greatest positive and negative correlations are presented for network-to-network connectivity analyses correlated with phantom sensation (TA: n = 5, AA: n=10).

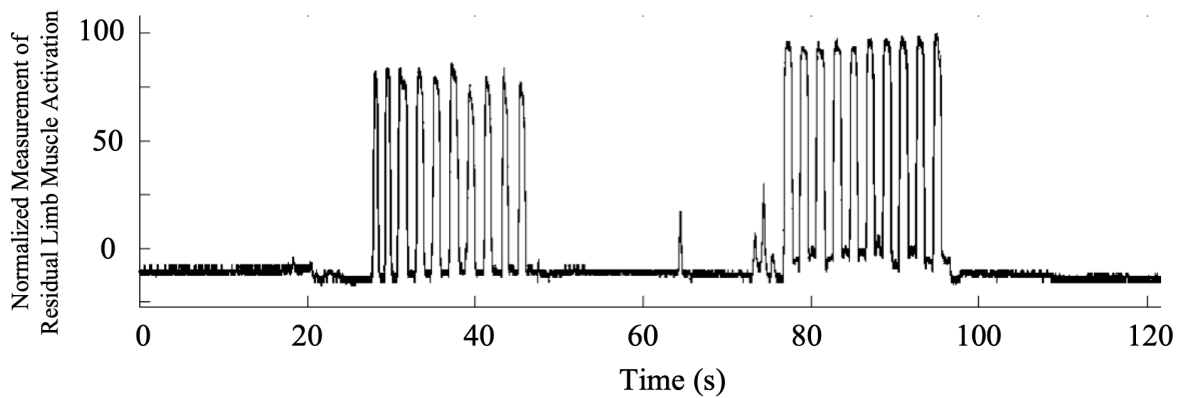

**Fig. S6.** Residual limb muscle activation during task. Normalized measurement of the tibialis anterior demonstrates consistent activation of the AMI musculature for 20 seconds each at two distinct levels, corresponding to the 25% ankle movement for the localizer and 75% ankle movement for the task. Representative data from one subject are provided.



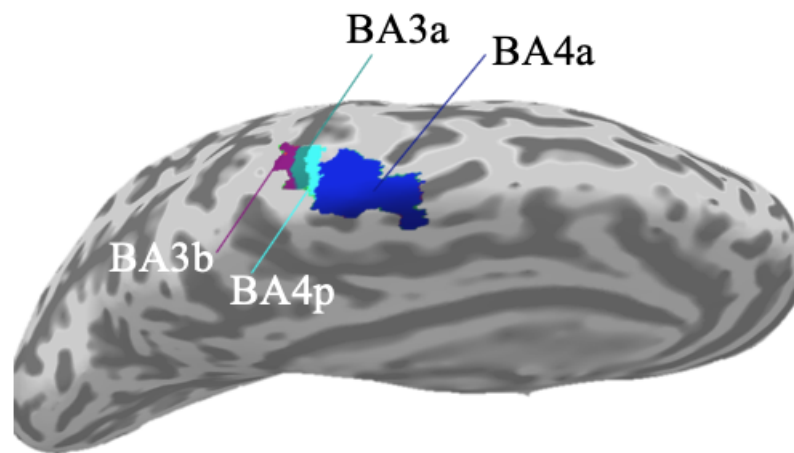

**Fig. S7. ROI segmentation.** ROI determination was performed to determine the active regions and subdivide them amongst the pre-defined Brodman areas (BA3a, BA4a, BA3b, and BA4p). This represents the mean ROI produced amongst all subjects.

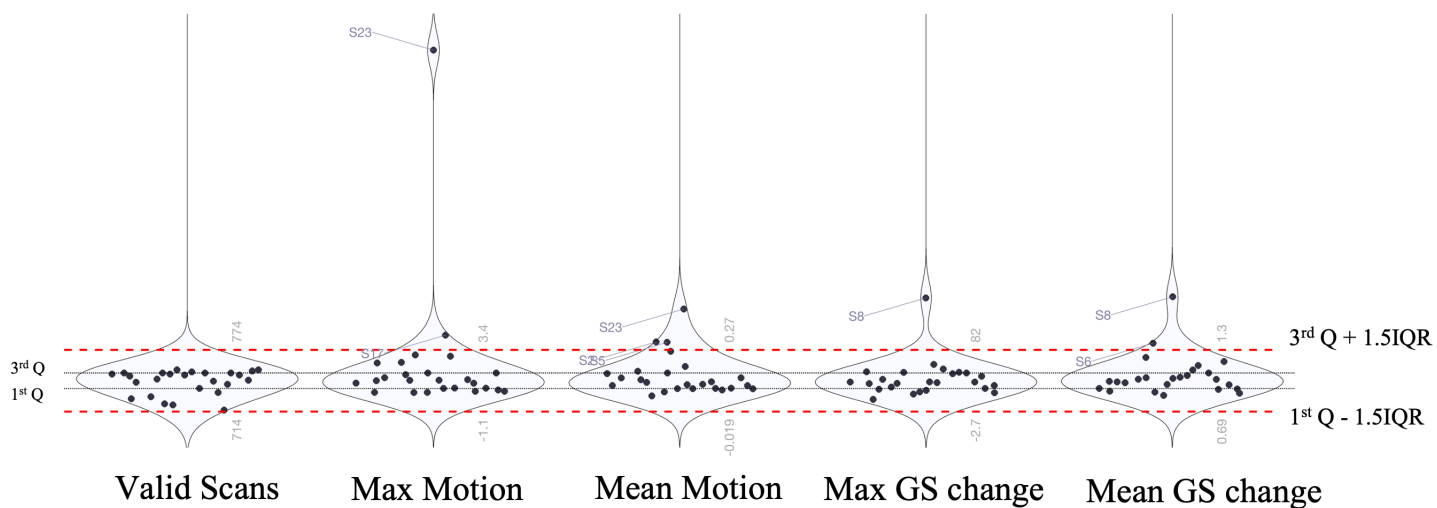

**Fig. S8. Quality control histograms of motion correction parameter values across all participants.** For n=25 patients, the distribution of values associated with motion during scanning is provided.

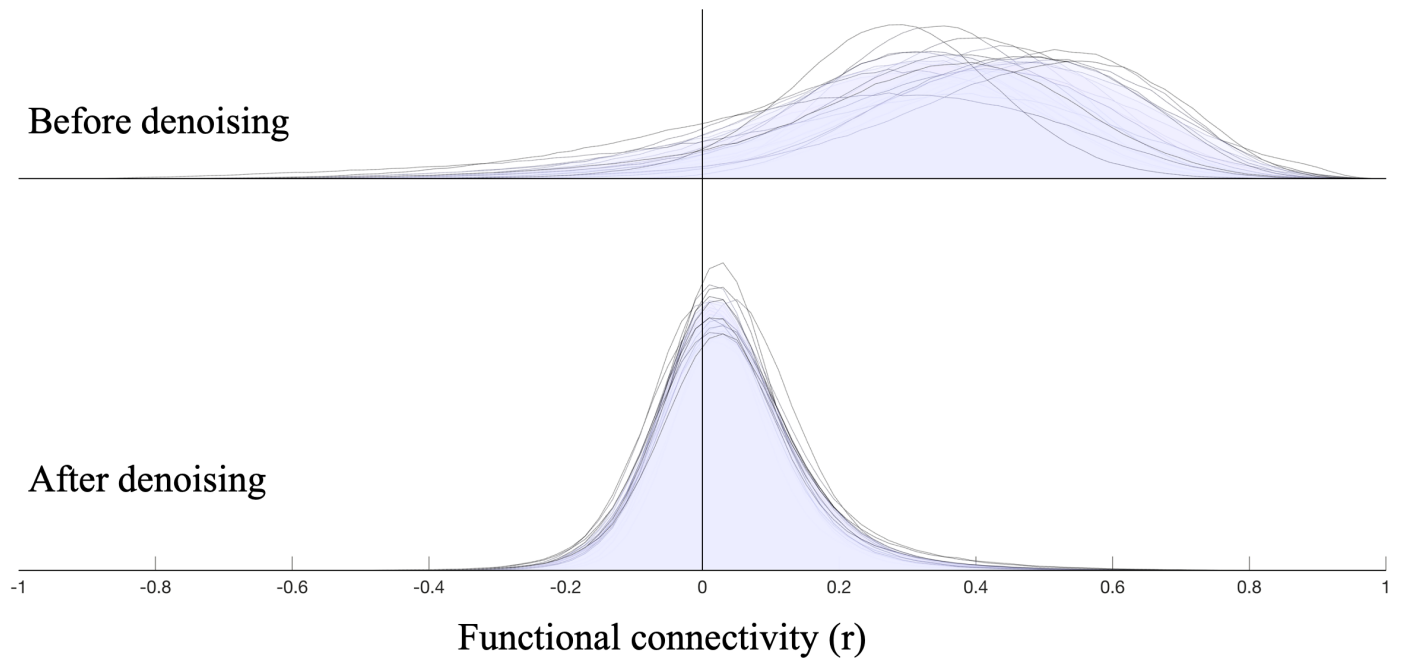

**Fig. S9. Quality assurance plot of denoising.** Distribution of functional correlations (Pearson correlation coefficient) across all participants before (top) and after denoising (bottom), which includes regression of white matter signals, cerebrospinal fluid signals, estimated head motion, and outliers reflecting additional structured noise sources (n=25).

**Table S1. Subject demographics**

| Group | Amputated Side | Dominant Side | Gender | Etiology       | Age at Amputation (years) | Age at scan | Amputation To Scan Time (months) |
|-------|----------------|---------------|--------|----------------|---------------------------|-------------|----------------------------------|
| AA    | L              | R             | M      | Trauma         | 52                        | 55          | 20                               |
|       | L              | R             | M      | Trauma         | 26                        | 27          | 12                               |
|       | R              | R             | M      | Trauma         | 52                        | 52          | 6                                |
|       | L              | R             | F      | Iatrogenic     | 65                        | 67          | 10                               |
|       | L              | L             | F      | Iatrogenic     | 20                        | 21          | 6                                |
|       | L              | L             | F      | Thermal Injury | 41                        | 42          | 13                               |
|       | R              | R             | F      | Trauma         | 28                        | 28          | 6                                |
|       | L              | L             | M      | Malformity     | 36                        | 37          | 14                               |
|       | L              | R             | M      | Trauma         | 52                        | 53          | 17                               |
|       | L              | R             | M      | Vascular       | 41                        | 42          | 13                               |
|       | L              | R             | M      | Trauma         | 26                        | 28          | 18                               |
|       | L              | R             | F      | Trauma         | 50                        | 52          | 26                               |
| TA    | R              | R             | F      | Trauma         | 59                        | 61          | 20                               |
|       | L              | R             | M      | Malformity     | 23                        | 25          | 24                               |
|       | L              | R             | F      | Trauma         | 58                        | 59          | 10                               |
|       | R              | R             | M      | Trauma         | 58                        | 60          | 23                               |
|       | L              | R             | M      | Trauma         | 56                        | 58          | 17                               |
|       | R              | R             | M      | Trauma         | 36                        | 39          | 30                               |
|       | R              | R             | M      | Trauma         | 57                        | 59          | 22                               |
| NA    |                | L             | F      |                |                           | 21          |                                  |
|       |                | L             | M      |                |                           | 54          |                                  |
|       |                | L             | M      |                |                           | 31          |                                  |
|       |                | R             | F      |                |                           | 73          |                                  |
|       |                | R             | F      |                |                           | 45          |                                  |
|       |                | R             | M      |                |                           | 44          |                                  |
|       |                | R             | F      |                |                           | 37          |                                  |
|       |                | R             | F      |                |                           | 32          |                                  |
|       |                | R             | F      |                |                           | 22          |                                  |
|       | R              | F             |        |                | 24                        |             |                                  |

**Table S2. Individual subject data for functional activation and neuromuscular characteristics**

| <b>Group</b> | <b>BOLD Signal Change Percentage (%)</b> | <b>Fascicle Strain</b> | <b>Position Discrimination Score</b> |
|--------------|------------------------------------------|------------------------|--------------------------------------|
| AA           | 0.6805                                   | 0.096                  | 0.353                                |
|              | 0.2228                                   | 0.14                   | 0.555                                |
|              | 0.7612                                   | 0.117                  | 0.690                                |
|              | 0.9900                                   | 0.092                  | 1.800                                |
|              | 0.6045                                   | 0.087                  | 0.554                                |
|              | 0.9732                                   | 0.07                   | 1.070                                |
|              | 0.8601                                   | 0.144                  | 0.849                                |
|              | 1.6148                                   | 0.11                   | 0.797                                |
| TA           | 0.3633                                   | 0.0606                 |                                      |
|              | 0.7054                                   | 0.0248                 | 0.340                                |
|              | 0.2333                                   | 0.0392                 | 0.350                                |
|              | 0.2261                                   | 0.0398                 | 0.380                                |
|              | -0.5297                                  | 0.0223                 | 0.000                                |
|              | 0.2420                                   | 0.0431                 |                                      |
|              | -0.59                                    |                        |                                      |
| NA           | 0.2707                                   |                        |                                      |
|              | 0.6495                                   |                        |                                      |
|              | 0.4904                                   |                        |                                      |
|              | 0.8612                                   |                        |                                      |
|              | 0.5391                                   |                        |                                      |
|              | 0.7848                                   |                        |                                      |
|              | 0.7579                                   |                        |                                      |
|              | 1.5843                                   |                        |                                      |
|              | 1.5943                                   |                        |                                      |
